# Supplementary figures and images for: Long-Lasting Olfactory Dysfunction in Hospital Workers Due to COVID-19: Prevalence, Clinical Characteristics, and Most Affected Odorants
Source: MDPI journal article supplement (doi:10.3390/ijerph19095777), 2022-05-09

[illegible]

1.- .....

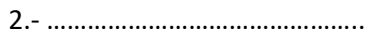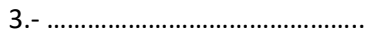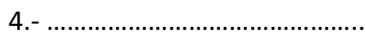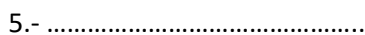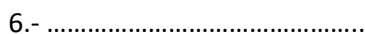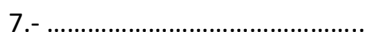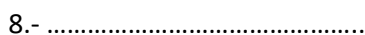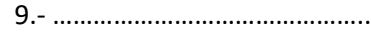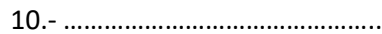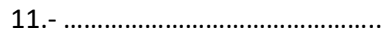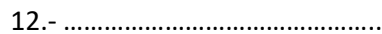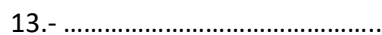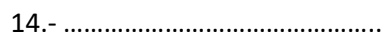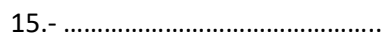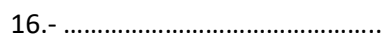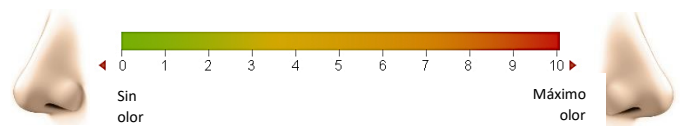

Supplement: s1 [file s1]
